# Supplementary material
Source: Springer Nature journal article supplement (https://www.springermedizin.de/resource/supplementary/12911_2004_43_MOESM1_ESM.pdf/9526988)

## ARCHER Annotations System

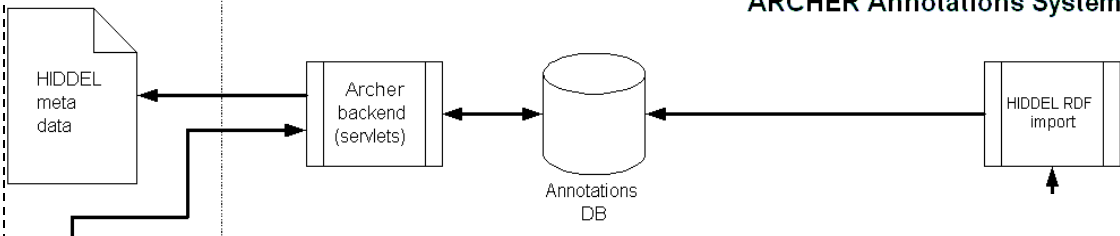

## CISMeF

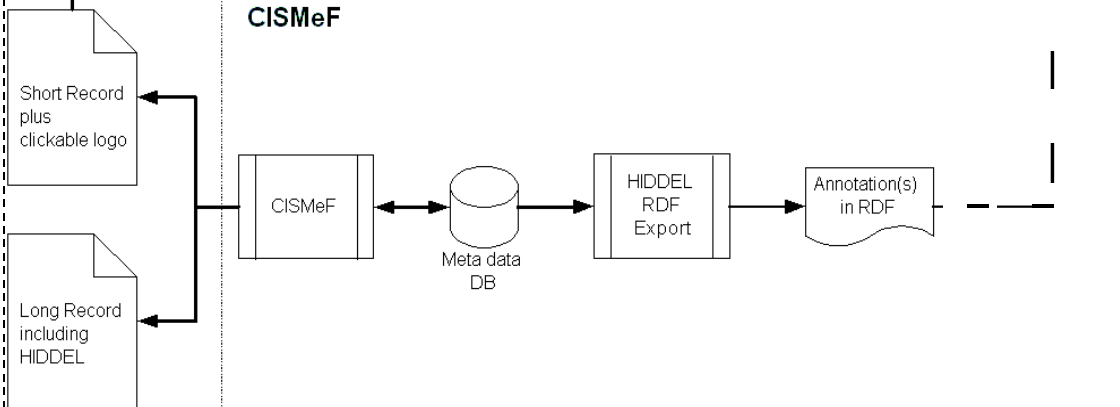

Supplement: MOESM1 [file 9526988]
